# Supplementary material for: Solution blow spinning of elastic 3D complex ZrO2@mullite nanofibrous aerogels toward customized thermal insulation
Source: Royal Society of Chemistry journal article supplement (doi:10.1039/d4qi01112k), 2024-01-01
Supplement: d4qi01112k1.pdf [file d4qi01112k1.pdf]

## Supporting Information

### Solution blow spinning of elastic 3D complex ZrO<sub>2</sub>@Mullite nanofibrous aerogels toward customized thermal insulation

**Wenlu Zhang**<sup>a</sup>, **Mengzhe Bao**<sup>b</sup>, **Mengyao Chen**<sup>c</sup>, **Wenbin Li**<sup>a,b,\*</sup>, **Weilin Xu**<sup>a,\*</sup>,  
**Chong He**<sup>a,b,\*</sup>

<sup>a</sup> State Key Laboratory of New Textile Materials and Advanced Processing Technologies, Wuhan Textile University, Wuhan, Hubei 430200, China

<sup>b</sup> School of Textile Science and Engineering, Wuhan Textile University, Wuhan, Hubei 430200, China

<sup>c</sup> School of Foreign Languages, Wuhan Textile University, Wuhan, Hubei 430200, China

**\*Corresponding author**

**E-mail address:** [Wenbin\\_li@wtu.edu.cn](mailto:Wenbin_li@wtu.edu.cn) (Prof. W. Li); [weilin\\_xu@wtu.edu.cn](mailto:weilin_xu@wtu.edu.cn) (Prof. W. Xu); [chhe@wtu.edu.cn](mailto:chhe@wtu.edu.cn) (Ph. D Chong He)

Supplementary Discussions

Supplementary Figures S1 to S18

## Supplementary Discussions

As shown in Figure S1, n-Propyl zirconate had a partial toughening effect for precursor solution. The optimal spinning viscosities were observed with the mullite precursor solution at 7.5 wt% and the ZrO<sub>2</sub>/Mullite precursor solution at 6 wt%. As shown in Figure S2, the precursor mullite fiber and ZrO<sub>2</sub>@Mullite nanofibers were dense and lightweight. The precursor cotton displayed a porous and dense structure, providing a foundational basis for subsequent investigations.

## Supplementary Figures

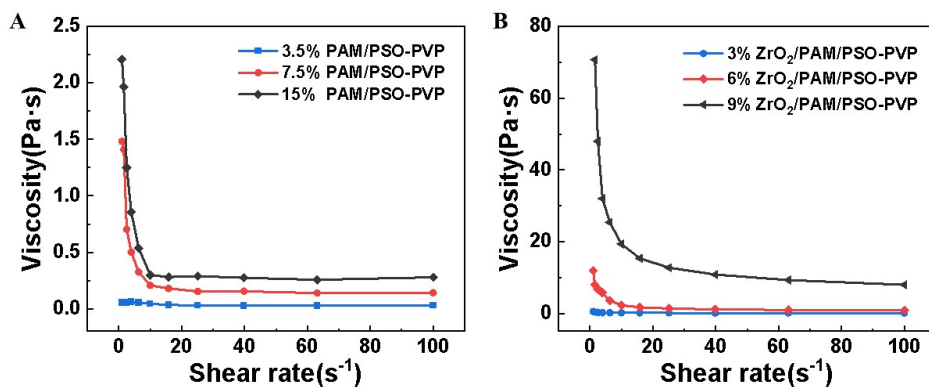

Figure S1 Viscosity of mullite and ZrO<sub>2</sub>@Mullite precursor solutions: (A) PAM/PSO-PVP; (B) ZrO<sub>2</sub>/PAM/PSO-PVP

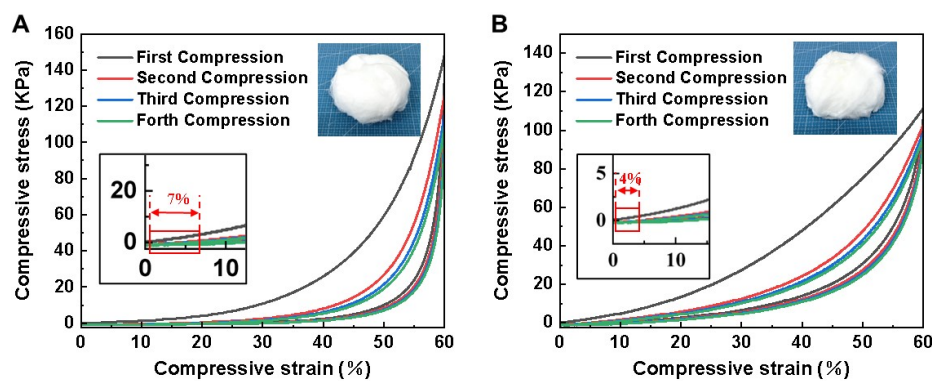

Figure S2 (A) Mullite precursor nanofibers and compression of mullite fibrous aerogels at 60% strain; (B) ZrO<sub>2</sub>@Mullite precursor nanofibers and compression of ZrO<sub>2</sub>@Mullite fibrous aerogels at 60% strain

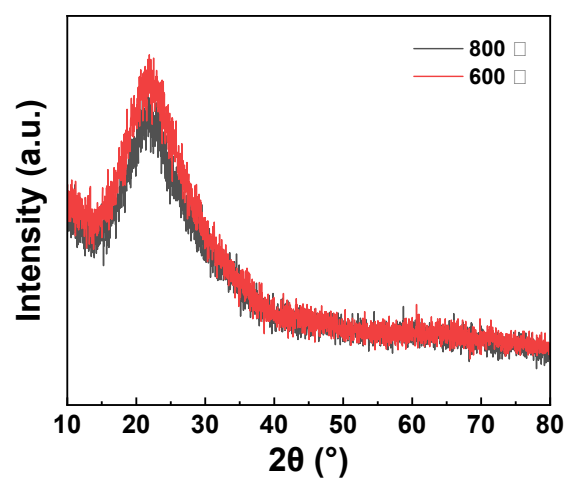

Figure S3 XRD of mullite nanofibers at 600 °C and 800 °C

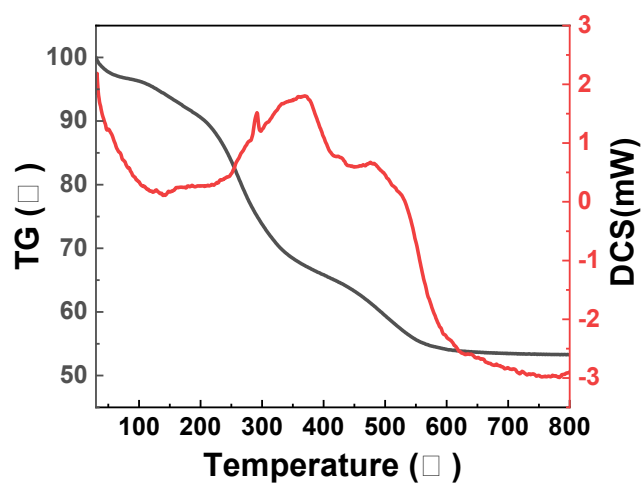

Figure S4 Thermogravimetric of mullite nanofibers at 800 °C

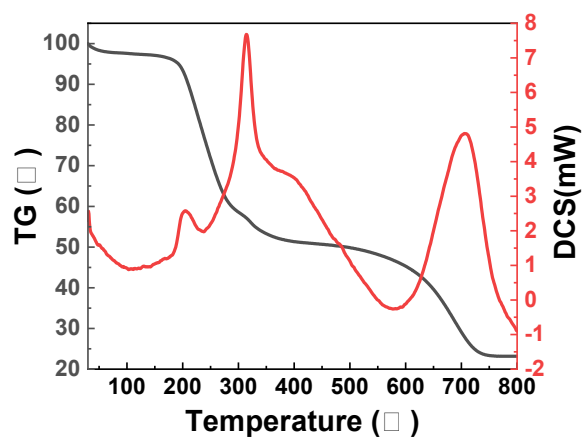

Figure S5 Thermogravimetric of  $\text{ZrO}_2$ @Mullite nanofibers at 800 °C

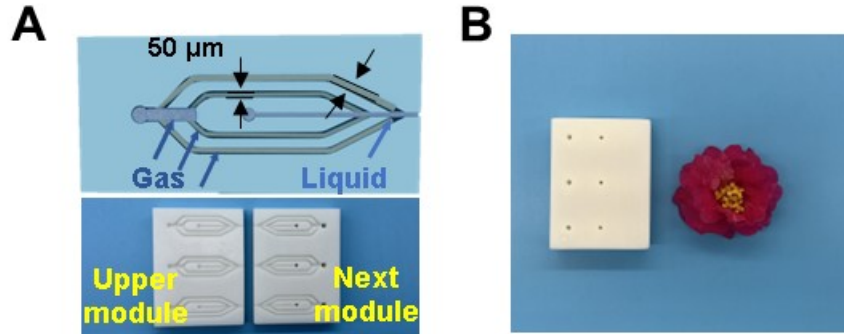

Figure S6 The structure of the microfluidic device: (A) the microstructure and physical diagram of the microfluidic device; (B) Size of microfluidic device

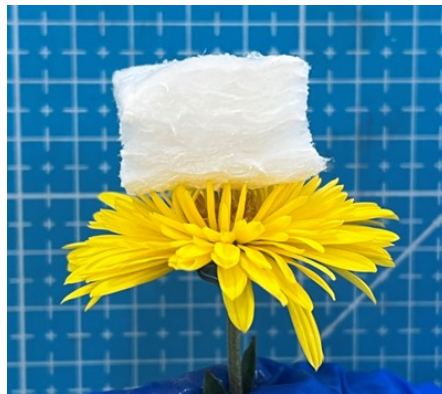

Figure S7 The lightweight  $\text{ZrO}_2$ @Mullite nanofibrous aerogels can be placed on the stamens

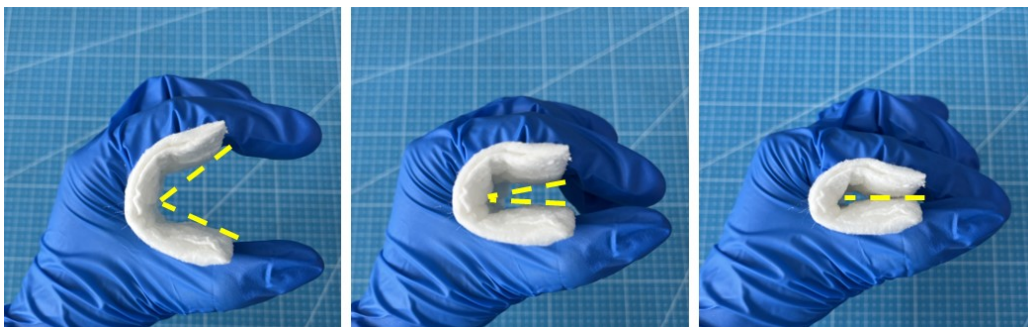

Figure S8  $\text{ZrO}_2$ @Mullite nanofibrous aerogels with different curvature

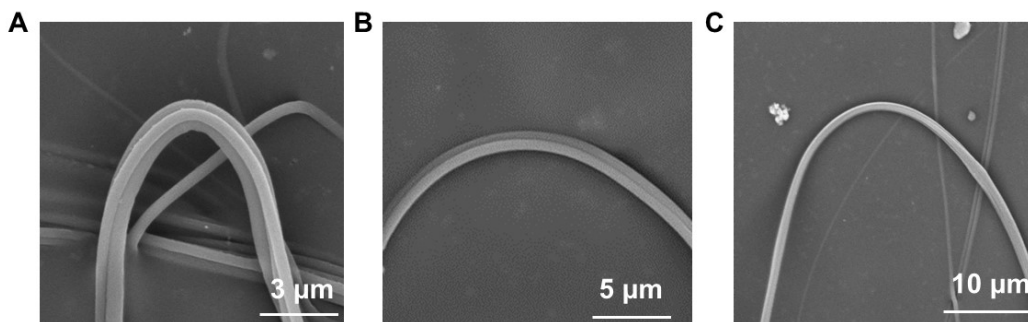

Figure S9 Microstructure of different bending nanofibers: (A) fiber bundles; (B) A small number of curved nanofibers; (C) Single curved nanofiber

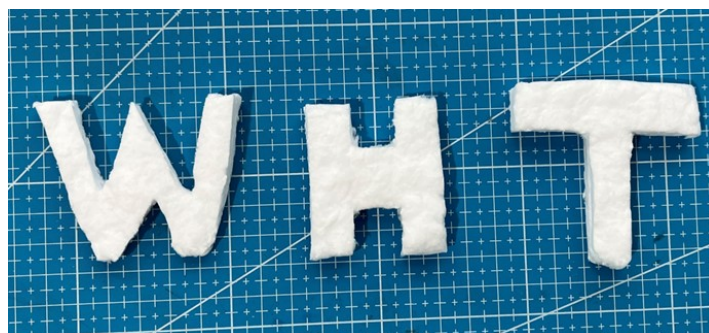

Figure S10  $\text{ZrO}_2$ @Mullite nanofibrous aerogels with different morphologies

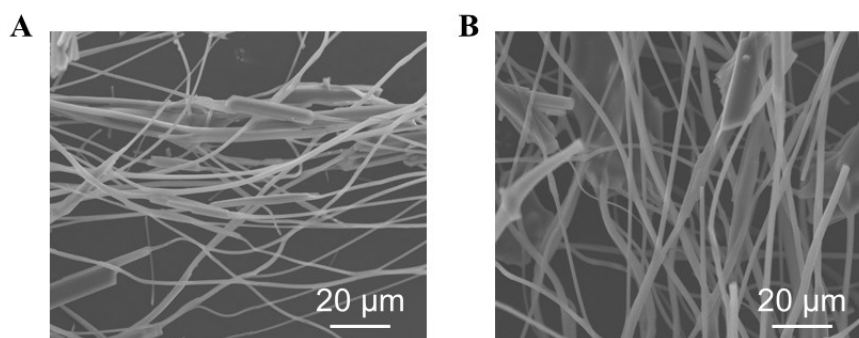

Figure S11 Microstructures of different fiber orientations: (A)  $0^\circ$ ; (B)  $90^\circ$

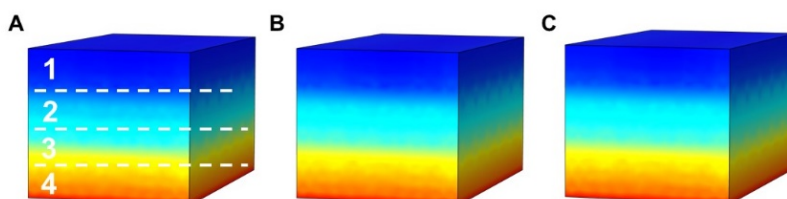

Figure S12 The temperature change of ordered lamellar  $\text{ZrO}_2@\text{Mullite}$  nanofibrous aerogel at different time: (A) 10s; (B) 30 s; (C) 50s

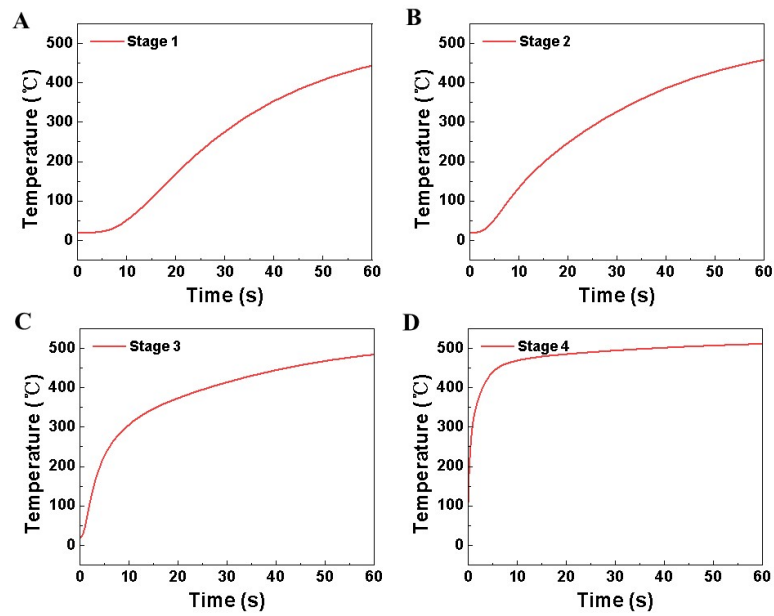

Figure S13 The temperature change curves of ordered lamellar fibrous aerogels at four stages: (A) Stage 1; (B) Stage 2; (C) Stage 3; (D) Stage 4

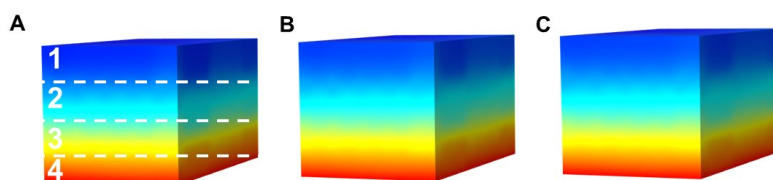

Figure S14 The temperature change of disordered lamellar  $\text{ZrO}_2@\text{Mullite}$  nanofibrous aerogel at different time: (A) 10s; (B) 30 s; (C) 50s

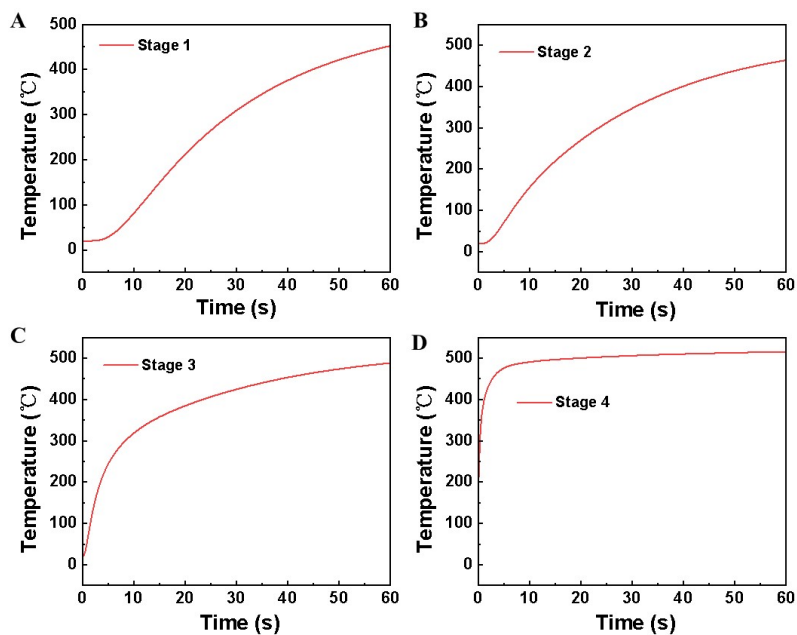

Figure S15 The temperature change curves of disordered lamellar fibrous aerogels at four stages: (A) Stage 1; (B) Stage 2; (C) Stage 3; (D) Stage 4

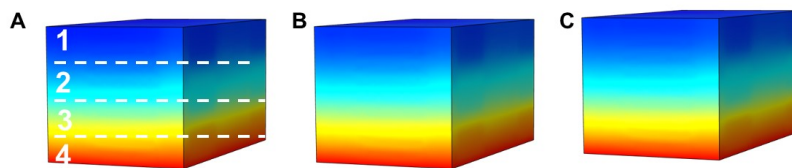

Figure S16 The temperature change of disordered  $ZrO_2@Mullite$  nanofibrous aerogel at different time: (A) 10s; (B) 30 s; (C) 50s



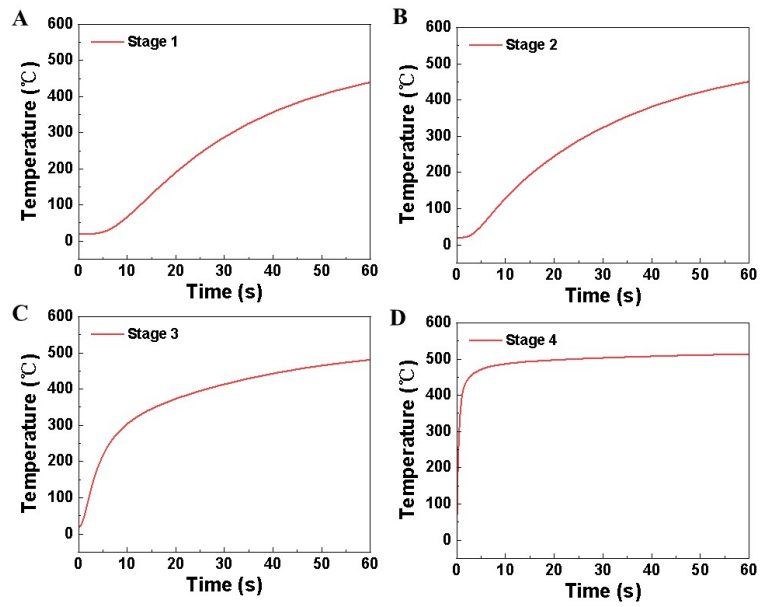

Figure S17 The temperature change curves of disordered fibrous aerogels at four stages: (A) Stage 1; (B) Stage 2; (C) Stage 3; (D) Stage 4

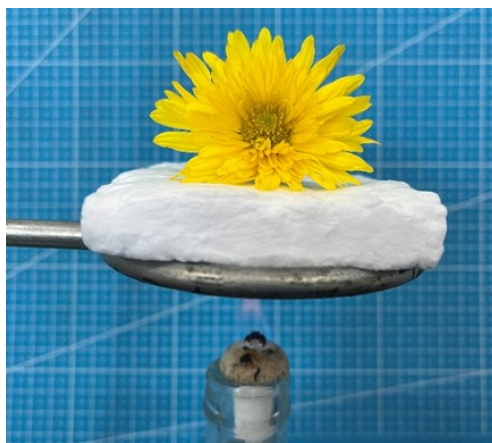

Figure S18 The thermal insulation of  $\text{ZrO}_2$ @Mullite nanofibrous aerogels
